# Supplementary material for: Occurrence and outcome of firework-related ocular injuries in Switzerland: A descriptive retrospective study
Source: Springer Nature journal article supplement (doi:10.1186/s12886-022-02513-9), 2022-07-07
Supplement: MOESM1 [file 23248118]

Case Report Form:

## Occurrence and outcome of ocular firework injuries in Switzerland

Instruction for answering the Case Report Form:

1. Only one choice →
2. Multiple choice →

|            |                                            |                        |
|------------|--------------------------------------------|------------------------|
| Hospital_1 | Consecutive Number Abbreviation <u>XXX</u> | Date <u>DD.MM.YYYY</u> |
|------------|--------------------------------------------|------------------------|

### Demographic Data

Age at time point of injury XX years  
(In case of < 1 year: XX months)

### Gender

Male  Female

Date of injury DD.MM.YYYY  Unknown  Others: \_\_\_\_\_

Date of first presentation DD.MM.YYYY

### Role during firework

Bystander  Operator  Unknown  others: please specify \_\_\_\_\_

### Injured eyes

Right Eye  Left Eye  Both Eyes

### Firework type

Rocket

(Translation: German: Rakete; French: fusée; Italian: razzo pirotecnico)

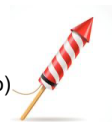

Crackers

(Translation: German: Knallkörper/Böller; French: pétard; Italian: petardo)

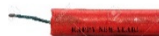

Volcano fountain

(Translation: German: Fontäne/Vulkan; French: pétard; Italian: petardo)

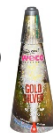

Ground Spinners

(Translation: not available)

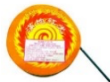

Others: please specify \_\_\_\_\_

Unknown

### Alcohol abuse at time point of firework injury

Yes  No  Unknown  Others: please specify \_\_\_\_\_

### Drug abuse at time point of firework injury

Yes  No  Unknown  Others: please specify \_\_\_\_\_

**Occurrence and outcome  
of ocular firework injuries in Switzerland**

**Other parts of the body injured**

- None
- Other parts of the head/face beside of eyes and lid
- Hands/fingers
- Arm
- Lower extremities
- Trunk
- Unknown
- Others: please specify \_\_\_\_\_

**Ophthalmological diagnosis before injury**

| <input type="checkbox"/> Right Eye                      | <input type="checkbox"/> Left Eye                       |
|---------------------------------------------------------|---------------------------------------------------------|
| <input type="checkbox"/> None                           | <input type="checkbox"/> None                           |
| <input type="checkbox"/> Myopia                         | <input type="checkbox"/> Myopia                         |
| <input type="checkbox"/> Hyperopia                      | <input type="checkbox"/> Hyperopia                      |
| <input type="checkbox"/> Astigmatism                    | <input type="checkbox"/> Astigmatism                    |
| <input type="checkbox"/> Amblyopia                      | <input type="checkbox"/> Amblyopia                      |
| <input type="checkbox"/> Glaucoma                       | <input type="checkbox"/> Glaucoma                       |
| <input type="checkbox"/> Cataract                       | <input type="checkbox"/> Cataract                       |
| <input type="checkbox"/> Status post cataract surgery   | <input type="checkbox"/> Status post cataract surgery   |
| <input type="checkbox"/> Status post refractive surgery | <input type="checkbox"/> Status post refractive surgery |
| Type of intervention _____                              | Type of intervention _____                              |
| <input type="checkbox"/> Status post Lid surgery;       | <input type="checkbox"/> Status post Lid surgery;       |
| Type of intervention _____                              | Type of intervention _____                              |
| <input type="checkbox"/> Status post retinal surgery    | <input type="checkbox"/> Status post retinal surgery    |
| Type of intervention _____                              | Type of intervention _____                              |
| <input type="checkbox"/> Status post glaucoma surgery   | <input type="checkbox"/> Status post glaucoma surgery   |
| Type of intervention _____                              | Type of intervention _____                              |
| <input type="checkbox"/> Status post trauma             | <input type="checkbox"/> Status post trauma             |
| Please specify _____                                    | Please specify _____                                    |
| <input type="checkbox"/> Unknown                        | <input type="checkbox"/> Unknown                        |
| <input type="checkbox"/> Others: please specify         | <input type="checkbox"/> Others: please specify         |
| _____                                                   | _____                                                   |
| _____                                                   | _____                                                   |

## Occurrence and outcome of ocular firework injuries in Switzerland

### Best corrected visual acuity after injury

Please provide information about both eyes in case of bilateral injury. In case of unilateral injury cross out the unaffected eye.

| <input type="checkbox"/> Right Eye (if injured)                                                                                                                                                                                                                                                                                                                                                                                                                            | <input type="checkbox"/> Left Eye (if injured)                                                                                                                                                                                                                                                                                                                                                                                                                             |
|----------------------------------------------------------------------------------------------------------------------------------------------------------------------------------------------------------------------------------------------------------------------------------------------------------------------------------------------------------------------------------------------------------------------------------------------------------------------------|----------------------------------------------------------------------------------------------------------------------------------------------------------------------------------------------------------------------------------------------------------------------------------------------------------------------------------------------------------------------------------------------------------------------------------------------------------------------------|
| <p><b>I. At first presentation:</b></p> <p><input type="radio"/> Unknown</p> <p><input type="radio"/> Non-light perception</p> <p><input type="radio"/> Light perception</p> <p><input type="radio"/> Hand movement</p> <p><input type="radio"/> Finger counting</p> <p><input type="radio"/> Decimal scale: <u>X.XX</u> (0.05 – 1.6)</p> <p><input type="radio"/> Others: please specify</p> <p>_____</p>                                                                 | <p><b>I. At first presentation:</b></p> <p><input type="radio"/> Unknown</p> <p><input type="radio"/> Non-light perception</p> <p><input type="radio"/> Light perception</p> <p><input type="radio"/> Hand movement</p> <p><input type="radio"/> Finger counting</p> <p><input type="radio"/> Decimal scale: <u>X.XX</u> (0.05 – 1.6)</p> <p><input type="radio"/> Others: please specify</p> <p>_____</p>                                                                 |
| <p><b>II. One-year follow-up:</b></p> <p><input type="radio"/> No one-year follow-up</p> <p><input type="radio"/> Unknown</p> <p><input type="radio"/> Non-light perception</p> <p><input type="radio"/> Light perception</p> <p><input type="radio"/> Hand movement</p> <p><input type="radio"/> Finger counting</p> <p><input type="radio"/> Decimal scale: <u>X.XX</u> (0.05 – 1.6)</p> <p><input type="radio"/> Others: please specify</p> <p>_____</p>                | <p><b>II. One-year follow-up:</b></p> <p><input type="radio"/> No one-year follow-up</p> <p><input type="radio"/> Unknown</p> <p><input type="radio"/> Non-light perception</p> <p><input type="radio"/> Light perception</p> <p><input type="radio"/> Hand movement</p> <p><input type="radio"/> Finger counting</p> <p><input type="radio"/> Decimal scale: <u>X.XX</u> (0.05 – 1.6)</p> <p><input type="radio"/> Others: please specify</p> <p>_____</p>                |
| <p><b>III. At last follow-up</b></p> <p><u>DD.MM.YYYY</u></p> <p><input type="radio"/> No follow-up</p> <p><input type="radio"/> Unknown</p> <p><input type="radio"/> Non-light perception</p> <p><input type="radio"/> Light perception</p> <p><input type="radio"/> Hand movement</p> <p><input type="radio"/> Finger counting</p> <p><input type="radio"/> Decimal scale: <u>X.XX</u> (0.05 – 1.6)</p> <p><input type="radio"/> Others: please specify</p> <p>_____</p> | <p><b>III. At last follow-up</b></p> <p><u>DD.MM.YYYY</u></p> <p><input type="radio"/> No follow-up</p> <p><input type="radio"/> Unknown</p> <p><input type="radio"/> Non-light perception</p> <p><input type="radio"/> Light perception</p> <p><input type="radio"/> Hand movement</p> <p><input type="radio"/> Finger counting</p> <p><input type="radio"/> Decimal scale: <u>X.XX</u> (0.05 – 1.6)</p> <p><input type="radio"/> Others: please specify</p> <p>_____</p> |

**Occurrence and outcome  
of ocular firework injuries in Switzerland**

**Intraocular pressure (IOP)**

Please provide information about both eyes in case of bilateral injury. In case of unilateral injury cross out the unaffected eye.

| <input type="checkbox"/> <b>Right Eye</b> (if injured)                                                                                                                                                                                                                                                                                                                                                                                                                                                                                                                                      | <input type="checkbox"/> <b>Left Eye</b> (if injured)                                                                                                                                                                                                                                                                                                                                                                                                                                                                                                                                       |
|---------------------------------------------------------------------------------------------------------------------------------------------------------------------------------------------------------------------------------------------------------------------------------------------------------------------------------------------------------------------------------------------------------------------------------------------------------------------------------------------------------------------------------------------------------------------------------------------|---------------------------------------------------------------------------------------------------------------------------------------------------------------------------------------------------------------------------------------------------------------------------------------------------------------------------------------------------------------------------------------------------------------------------------------------------------------------------------------------------------------------------------------------------------------------------------------------|
| <p><b>I. At first presentation:</b></p> <p><input type="radio"/> <u>XX</u> mmHg<br/> <input type="radio"/> Unknown<br/> <b>Under IOP lowering therapy</b><br/> <input type="radio"/> Yes <input type="radio"/> No <input type="radio"/> Unknown<br/> <input type="radio"/> Others: _____</p> <p><b>St. p. Glaucoma surgery</b> <u>MM.YYYY</u><br/> <input type="radio"/> Yes <input type="radio"/> No <input type="radio"/> Unknown<br/>                     - if yes, specify _____</p>                                                                                                    | <p><b>I. At first presentation:</b></p> <p><input type="radio"/> <u>XX</u> mmHg<br/> <input type="radio"/> Unknown<br/> <b>Under IOP lowering therapy</b><br/> <input type="radio"/> Yes <input type="radio"/> No <input type="radio"/> Unknown<br/> <input type="radio"/> Others: _____</p> <p><b>St. p. Glaucoma surgery</b> <u>MM.YYYY</u><br/> <input type="radio"/> Yes <input type="radio"/> No <input type="radio"/> Unknown<br/>                     - if yes, specify _____</p>                                                                                                    |
| <p><b>II. One-year follow-up:</b></p> <p><input type="radio"/> <u>XX</u> mmHg<br/> <input type="radio"/> No one-year follow-up<br/> <input type="radio"/> Unknown<br/> <input type="radio"/> Others: _____</p> <p><b>Under IOP lowering therapy</b><br/> <input type="radio"/> Yes <input type="radio"/> No <input type="radio"/> Unknown<br/> <input type="radio"/> Others: _____</p> <p><b>St. p. Glaucoma surgery</b> <u>MM.YYYY</u><br/> <input type="radio"/> Yes <input type="radio"/> No <input type="radio"/> Unknown<br/>                     - if yes, specify _____</p>          | <p><b>II. One-year follow-up:</b></p> <p><input type="radio"/> <u>XX</u> mmHg<br/> <input type="radio"/> No one-year follow-up<br/> <input type="radio"/> Unknown<br/> <input type="radio"/> Others: _____</p> <p><b>Under IOP lowering therapy</b><br/> <input type="radio"/> Yes <input type="radio"/> No <input type="radio"/> Unknown<br/> <input type="radio"/> Others: _____</p> <p><b>St. p. Glaucoma surgery</b> <u>MM.YYYY</u><br/> <input type="radio"/> Yes <input type="radio"/> No <input type="radio"/> Unknown<br/>                     - if yes, specify _____</p>          |
| <p><b>III. At last follow-up</b> <u>DD.MM.YYYY</u>:</p> <p><input type="radio"/> <u>XX</u> mmHg<br/> <input type="radio"/> No follow-up<br/> <input type="radio"/> Unknown<br/> <input type="radio"/> Others: _____</p> <p><b>Under IOP lowering therapy</b><br/> <input type="radio"/> Yes <input type="radio"/> No <input type="radio"/> Unknown<br/> <input type="radio"/> Others: _____</p> <p><b>St. p. Glaucoma surgery</b> <u>MM.YYYY</u><br/> <input type="radio"/> Yes <input type="radio"/> No <input type="radio"/> Unknown<br/>                     - if yes, specify _____</p> | <p><b>III. At last follow-up</b> <u>DD.MM.YYYY</u>:</p> <p><input type="radio"/> <u>XX</u> mmHg<br/> <input type="radio"/> No follow-up<br/> <input type="radio"/> Unknown<br/> <input type="radio"/> Others: _____</p> <p><b>Under IOP lowering therapy</b><br/> <input type="radio"/> Yes <input type="radio"/> No <input type="radio"/> Unknown<br/> <input type="radio"/> Others: _____</p> <p><b>St. p. Glaucoma surgery</b> <u>MM.YYYY</u><br/> <input type="radio"/> Yes <input type="radio"/> No <input type="radio"/> Unknown<br/>                     - if yes, specify _____</p> |

Case Report Form:

## Occurrence and outcome of ocular firework injuries in Switzerland

### Maximal Intraocular Pressure (IOP)

Please provide information about both eyes in case of bilateral injury. In case of unilateral injury cross out the unaffected eye.

| <input type="checkbox"/> <b>Right Eye</b> (if injured)                                                                                                                                                         | <input type="checkbox"/> <b>Left Eye</b> (if injured)                                                                                                                                                          |
|----------------------------------------------------------------------------------------------------------------------------------------------------------------------------------------------------------------|----------------------------------------------------------------------------------------------------------------------------------------------------------------------------------------------------------------|
| <b>I. In the first week:</b><br><input type="radio"/> Max. <u>XX</u> mmHg on <u>DD.MM.YYYY</u><br><input type="radio"/> No follow-up<br><input type="radio"/> Unknown<br><input type="radio"/> Others: _____   | <b>I. In the first week:</b><br><input type="radio"/> Max. <u>XX</u> mmHg on <u>DD.MM.YYYY</u><br><input type="radio"/> No follow-up<br><input type="radio"/> Unknown<br><input type="radio"/> Others: _____   |
| <b>II. In the first month:</b><br><input type="radio"/> Max. <u>XX</u> mmHg on <u>DD.MM.YYYY</u><br><input type="radio"/> No follow-up<br><input type="radio"/> Unknown<br><input type="radio"/> Others: _____ | <b>II. In the first month:</b><br><input type="radio"/> Max. <u>XX</u> mmHg on <u>DD.MM.YYYY</u><br><input type="radio"/> No follow-up<br><input type="radio"/> Unknown<br><input type="radio"/> Others: _____ |
| <b>III. In the first year:</b><br><input type="radio"/> Max. <u>XX</u> mmHg on <u>DD.MM.YYYY</u><br><input type="radio"/> No follow-up<br><input type="radio"/> Unknown<br><input type="radio"/> Others: _____ | <b>III. In the first year:</b><br><input type="radio"/> Max. <u>XX</u> mmHg on <u>DD.MM.YYYY</u><br><input type="radio"/> No follow-up<br><input type="radio"/> Unknown<br><input type="radio"/> Others: _____ |

## Occurrence and outcome of ocular firework injuries in Switzerland

### Findings at first presentation

Please provide information about both eyes in case of bilateral injury. In case of unilateral injury cross out the unaffected eye.

| <input type="checkbox"/> <b>Right Eye</b> (if injured)                                                                                                                                                                                                                                                                                                                                                                                                                                                                                                                                                                                                                                                                                                                                                                                                                                                                                                                                                                                                                                                                                                                                                                                                                                                                                                                                                                                                                                                                                                                                                                                                                                                                                                                                                                                                                                                                                                                                                                                                                                                                                                                                                                            | <input type="checkbox"/> <b>Left Eye</b> (if injured)                                                                                                                                                                                                                                                                                                                                                                                                                                                                                                                                                                                                                                                                                                                                                                                                                                                                                                                                                                                                                                                                                                                                                                                                                                                                                                                                                                                                                                                                                                                                                                                                                                                                                                                                                                                                                                                                                                                                                                                                                                                                                                                                                                             |
|-----------------------------------------------------------------------------------------------------------------------------------------------------------------------------------------------------------------------------------------------------------------------------------------------------------------------------------------------------------------------------------------------------------------------------------------------------------------------------------------------------------------------------------------------------------------------------------------------------------------------------------------------------------------------------------------------------------------------------------------------------------------------------------------------------------------------------------------------------------------------------------------------------------------------------------------------------------------------------------------------------------------------------------------------------------------------------------------------------------------------------------------------------------------------------------------------------------------------------------------------------------------------------------------------------------------------------------------------------------------------------------------------------------------------------------------------------------------------------------------------------------------------------------------------------------------------------------------------------------------------------------------------------------------------------------------------------------------------------------------------------------------------------------------------------------------------------------------------------------------------------------------------------------------------------------------------------------------------------------------------------------------------------------------------------------------------------------------------------------------------------------------------------------------------------------------------------------------------------------|-----------------------------------------------------------------------------------------------------------------------------------------------------------------------------------------------------------------------------------------------------------------------------------------------------------------------------------------------------------------------------------------------------------------------------------------------------------------------------------------------------------------------------------------------------------------------------------------------------------------------------------------------------------------------------------------------------------------------------------------------------------------------------------------------------------------------------------------------------------------------------------------------------------------------------------------------------------------------------------------------------------------------------------------------------------------------------------------------------------------------------------------------------------------------------------------------------------------------------------------------------------------------------------------------------------------------------------------------------------------------------------------------------------------------------------------------------------------------------------------------------------------------------------------------------------------------------------------------------------------------------------------------------------------------------------------------------------------------------------------------------------------------------------------------------------------------------------------------------------------------------------------------------------------------------------------------------------------------------------------------------------------------------------------------------------------------------------------------------------------------------------------------------------------------------------------------------------------------------------|
| <p><b>Anterior segment findings</b></p> <p><b>I. Lid and lacrimal system</b></p> <p><input type="checkbox"/> None</p> <p><input type="checkbox"/> Eyelid laceration</p> <p><input type="checkbox"/> Traumatic ptosis</p> <p><input type="checkbox"/> Lid burn</p> <p><input type="checkbox"/> Charred eyelashes</p> <p><input type="checkbox"/> Canalicular laceration</p> <p><input type="checkbox"/> Others_____</p> <p><b>II. Conjunctiva and sklera</b></p> <p><input type="checkbox"/> None</p> <p><input type="checkbox"/> Hyposphagma</p> <p><input type="checkbox"/> Chemosis</p> <p><input type="checkbox"/> Conjunctival foreign body</p> <p style="padding-left: 20px;"><input type="checkbox"/> Ash</p> <p style="padding-left: 20px;"><input type="checkbox"/> Solid particles</p> <p><input type="checkbox"/> Conjunctival burn</p> <p><input type="checkbox"/> Conjunctival laceration, if yes</p> <p style="padding-left: 20px;"><input type="radio"/> XX mm x XX mm</p> <p style="padding-left: 20px;"><input type="radio"/> unknown</p> <p style="padding-left: 20px;"><input type="radio"/> others: _____</p> <p style="padding-left: 20px;"><input type="checkbox"/> superior</p> <p style="padding-left: 20px;"><input type="checkbox"/> inferior</p> <p style="padding-left: 20px;"><input type="checkbox"/> temporal</p> <p style="padding-left: 20px;"><input type="checkbox"/> nasal</p> <p><input type="checkbox"/> Scleral laceration; if yes:</p> <p style="padding-left: 20px;"><input type="radio"/> &gt; 3.5mm away from the limbus</p> <p style="padding-left: 20px;"><input type="radio"/> &lt; 3.5mm away from the limbus</p> <p style="padding-left: 20px;"><input type="radio"/> Others: _____</p> <p><input type="checkbox"/> Corneoscleral laceration</p> <p><input type="checkbox"/> Others_____</p> <p><b>III. Cornea</b></p> <p><input type="checkbox"/> None</p> <p><input type="checkbox"/> Corneal foreign body</p> <p style="padding-left: 20px;"><input type="checkbox"/> central</p> <p style="padding-left: 20px;"><input type="checkbox"/> peripheral</p> <p style="padding-left: 20px;"><input type="checkbox"/> others: _____</p> <p><input type="checkbox"/> Corneal burn</p> | <p><b>Anterior segment findings</b></p> <p><b>I. Lid and lacrimal system</b></p> <p><input type="checkbox"/> None</p> <p><input type="checkbox"/> Eyelid laceration</p> <p><input type="checkbox"/> Traumatic ptosis</p> <p><input type="checkbox"/> Lid burn</p> <p><input type="checkbox"/> Charred eyelashes</p> <p><input type="checkbox"/> Canalicular laceration</p> <p><input type="checkbox"/> Others_____</p> <p><b>II. Conjunctiva and sklera</b></p> <p><input type="checkbox"/> None</p> <p><input type="checkbox"/> Hyposphagma</p> <p><input type="checkbox"/> Chemosis</p> <p><input type="checkbox"/> Conjunctival foreign body</p> <p style="padding-left: 20px;"><input type="checkbox"/> Ash</p> <p style="padding-left: 20px;"><input type="checkbox"/> Solid particles</p> <p><input type="checkbox"/> Conjunctival burn</p> <p><input type="checkbox"/> Conjunctival laceration, if yes</p> <p style="padding-left: 20px;"><input type="radio"/> XX mm x XX mm</p> <p style="padding-left: 20px;"><input type="radio"/> unknown</p> <p style="padding-left: 20px;"><input type="radio"/> others: _____</p> <p style="padding-left: 20px;"><input type="checkbox"/> superior</p> <p style="padding-left: 20px;"><input type="checkbox"/> inferior</p> <p style="padding-left: 20px;"><input type="checkbox"/> temporal</p> <p style="padding-left: 20px;"><input type="checkbox"/> nasal</p> <p><input type="checkbox"/> Scleral laceration; if yes:</p> <p style="padding-left: 20px;"><input type="radio"/> &gt; 3.5mm away from the limbus</p> <p style="padding-left: 20px;"><input type="radio"/> &lt; 3.5mm away from the limbus</p> <p style="padding-left: 20px;"><input type="radio"/> Others: _____</p> <p><input type="checkbox"/> Corneoscleral laceration</p> <p><input type="checkbox"/> Others_____</p> <p><b>III. Cornea</b></p> <p><input type="checkbox"/> None</p> <p><input type="checkbox"/> Corneal foreign body</p> <p style="padding-left: 20px;"><input type="checkbox"/> central</p> <p style="padding-left: 20px;"><input type="checkbox"/> peripheral</p> <p style="padding-left: 20px;"><input type="checkbox"/> others: _____</p> <p><input type="checkbox"/> Corneal burn</p> |

**Occurrence and outcome  
of ocular firework injuries in Switzerland**

|                                                                                                                                                                                                                                                                                                                                                                                                                                                                                                                                                                                                                                                                                                                                                                                                                                                                                                                                                                                                                                                                                                                                                                                                                                                                                                                                                                                                                                                                                                                                                                                                                                                                                                                                                                                                                                                                                                                                                |                                                                                                                                                                                                                                                                                                                                                                                                                                                                                                                                                                                                                                                                                                                                                                                                                                                                                                                                                                                                                                                                                                                                                                                                                                                                                                                                                                                                                                                                                                                                                                                                                                                                                                                                                                                                                                                                                                                                                 |
|------------------------------------------------------------------------------------------------------------------------------------------------------------------------------------------------------------------------------------------------------------------------------------------------------------------------------------------------------------------------------------------------------------------------------------------------------------------------------------------------------------------------------------------------------------------------------------------------------------------------------------------------------------------------------------------------------------------------------------------------------------------------------------------------------------------------------------------------------------------------------------------------------------------------------------------------------------------------------------------------------------------------------------------------------------------------------------------------------------------------------------------------------------------------------------------------------------------------------------------------------------------------------------------------------------------------------------------------------------------------------------------------------------------------------------------------------------------------------------------------------------------------------------------------------------------------------------------------------------------------------------------------------------------------------------------------------------------------------------------------------------------------------------------------------------------------------------------------------------------------------------------------------------------------------------------------|-------------------------------------------------------------------------------------------------------------------------------------------------------------------------------------------------------------------------------------------------------------------------------------------------------------------------------------------------------------------------------------------------------------------------------------------------------------------------------------------------------------------------------------------------------------------------------------------------------------------------------------------------------------------------------------------------------------------------------------------------------------------------------------------------------------------------------------------------------------------------------------------------------------------------------------------------------------------------------------------------------------------------------------------------------------------------------------------------------------------------------------------------------------------------------------------------------------------------------------------------------------------------------------------------------------------------------------------------------------------------------------------------------------------------------------------------------------------------------------------------------------------------------------------------------------------------------------------------------------------------------------------------------------------------------------------------------------------------------------------------------------------------------------------------------------------------------------------------------------------------------------------------------------------------------------------------|
| <p> <input type="checkbox"/> central<br/> <input type="checkbox"/> peripheral<br/> <input type="checkbox"/> others: _____<br/> <input type="checkbox"/> Corneal epithelial defect<br/> <input type="checkbox"/> central<br/> <input type="checkbox"/> peripheral<br/> <input type="checkbox"/> others: _____<br/> <input type="checkbox"/> Corneal perforation<br/> <input type="checkbox"/> central<br/> <input type="checkbox"/> peripheral<br/>           O tissue defect: <u>XX</u> mm x <u>XX</u> mm<br/>           O cut: <u>XX</u> mm<br/>           O unknown<br/>           O others: _____<br/> <input type="checkbox"/> Corneal laceration; if yes:<br/> <input type="checkbox"/> central<br/> <input type="checkbox"/> peripheral<br/>           O area: <u>XX</u> mm x <u>XX</u> mm<br/>           O cut: <u>XX</u> mm<br/>           O unknown<br/>           O others: _____<br/> <input type="checkbox"/> Others _____<br/><br/> <b>IV. Anterior chamber, iris, lens, pupil</b><br/> <input type="checkbox"/> None<br/> <input type="checkbox"/> Iridodialysis<br/> <input type="checkbox"/> Aniridia<br/> <input type="checkbox"/> Traumatic mydriasis<br/> <input type="checkbox"/> Intracameral foreign body<br/> <input type="checkbox"/> Traumatic iritis<br/> <input type="checkbox"/> 0.5+ <input type="checkbox"/> 1+ <input type="checkbox"/> 2+ <input type="checkbox"/> 3+<br/> <input type="checkbox"/> Hyphemia, if yes:<br/>           O Height in mm <u>XX</u><br/>           O Total Hyphemia<br/>           O Others _____<br/> <input type="checkbox"/> RAPD (relative afferent pupillary defect)<br/> <input type="checkbox"/> Angle recession<br/> <input type="checkbox"/> Lens subluxation<br/> <input type="checkbox"/> Lens dislocation<br/> <input type="checkbox"/> Traumatic cataract<br/> <input type="checkbox"/> Ciliary body detachment<br/> <input type="checkbox"/> Others _____         </p> | <p> <input type="checkbox"/> central<br/> <input type="checkbox"/> peripheral<br/> <input type="checkbox"/> others: _____<br/> <input type="checkbox"/> Corneal epithelial defect<br/> <input type="checkbox"/> central<br/> <input type="checkbox"/> peripheral<br/> <input type="checkbox"/> others: _____<br/> <input type="checkbox"/> Corneal perforation<br/> <input type="checkbox"/> central<br/> <input type="checkbox"/> peripheral<br/>           O tissue defect: <u>XX</u> mm x <u>XX</u> mm<br/>           O cut: <u>XX</u> mm<br/>           O unknown<br/>           O others: _____<br/> <input type="checkbox"/> Corneal laceration; if yes:<br/> <input type="checkbox"/> central<br/> <input type="checkbox"/> peripheral<br/>           O area: <u>XX</u> mm x <u>XX</u> mm<br/>           O cut: <u>XX</u> mm<br/>           O unknown<br/>           O others: _____<br/> <input type="checkbox"/> Others _____<br/><br/> <b>IV. Anterior chamber, iris, lens, pupil</b><br/> <input type="checkbox"/> None<br/> <input type="checkbox"/> Iridodialysis<br/> <input type="checkbox"/> Aniridia<br/> <input type="checkbox"/> Traumatic mydriasis<br/> <input type="checkbox"/> Intracameral foreign body<br/> <input type="checkbox"/> Traumatic iritis<br/> <input type="checkbox"/> 0.5+ <input type="checkbox"/> 1+ <input type="checkbox"/> 2+ <input type="checkbox"/> 3+<br/> <input type="checkbox"/> Hyphemia, if yes:<br/>           O Height in mm <u>XX</u><br/>           O Total Hyphemia<br/>           O Others _____<br/> <input type="checkbox"/> RAPD (relative afferent pupillary defect)<br/> <input type="checkbox"/> Angle recession<br/> <input type="checkbox"/> Lens subluxation<br/> <input type="checkbox"/> Lens dislocation<br/> <input type="checkbox"/> Traumatic cataract<br/> <input type="checkbox"/> Ciliary body detachment<br/> <input type="checkbox"/> Others: _____         </p> |
| <p><b>Posterior segment findings</b></p> <p> <input type="checkbox"/> None<br/> <input type="checkbox"/> Vitreous hemorrhage         </p>                                                                                                                                                                                                                                                                                                                                                                                                                                                                                                                                                                                                                                                                                                                                                                                                                                                                                                                                                                                                                                                                                                                                                                                                                                                                                                                                                                                                                                                                                                                                                                                                                                                                                                                                                                                                      | <p><b>Posterior segment findings</b></p> <p> <input type="checkbox"/> None<br/> <input type="checkbox"/> Vitreous hemorrhage         </p>                                                                                                                                                                                                                                                                                                                                                                                                                                                                                                                                                                                                                                                                                                                                                                                                                                                                                                                                                                                                                                                                                                                                                                                                                                                                                                                                                                                                                                                                                                                                                                                                                                                                                                                                                                                                       |

Case Report Form:

**Occurrence and outcome  
of ocular firework injuries in Switzerland**

|                                                                                                                                                                                                                                                                                                                                                                                                                                                                                                                                                                                                                                                                    |                                                                                                                                                                                                                                                                                                                                                                                                                                                                                                                                                                                                                                                                    |
|--------------------------------------------------------------------------------------------------------------------------------------------------------------------------------------------------------------------------------------------------------------------------------------------------------------------------------------------------------------------------------------------------------------------------------------------------------------------------------------------------------------------------------------------------------------------------------------------------------------------------------------------------------------------|--------------------------------------------------------------------------------------------------------------------------------------------------------------------------------------------------------------------------------------------------------------------------------------------------------------------------------------------------------------------------------------------------------------------------------------------------------------------------------------------------------------------------------------------------------------------------------------------------------------------------------------------------------------------|
| <input type="checkbox"/> Retinal hemorrhage<br><input type="checkbox"/> Retinal contusion/ Berlin's edema<br><input type="checkbox"/> Traumatic optic neuropathy<br><input type="checkbox"/> Retinal detachment<br><input type="checkbox"/> Choroidal detachment<br><input type="checkbox"/> Choroidal rupture<br><input type="checkbox"/> Traumatic retinal foramen<br><input type="checkbox"/> Giant retinal tear<br><input type="checkbox"/> Traumatic macular hole<br><input type="checkbox"/> Intravitreal foreign body<br><input type="checkbox"/> Retinal foreign body<br><input type="checkbox"/> Endophthalmitis<br><input type="checkbox"/> Others _____ | <input type="checkbox"/> Retinal hemorrhage<br><input type="checkbox"/> Retinal contusion/ Berlin's edema<br><input type="checkbox"/> Traumatic optic neuropathy<br><input type="checkbox"/> Retinal detachment<br><input type="checkbox"/> Choroidal detachment<br><input type="checkbox"/> Choroidal rupture<br><input type="checkbox"/> Traumatic retinal foramen<br><input type="checkbox"/> Giant retinal tear<br><input type="checkbox"/> Traumatic macular hole<br><input type="checkbox"/> Intravitreal foreign body<br><input type="checkbox"/> Retinal foreign body<br><input type="checkbox"/> Endophthalmitis<br><input type="checkbox"/> Others _____ |
| <b>General findings</b><br><input type="checkbox"/> None<br><input type="checkbox"/> Globe rupture<br><input type="checkbox"/> Traumatic ophthalmoplegia<br><input type="checkbox"/> Orbital fracture<br><input type="checkbox"/> Traumatic retrobulbar hemorrhage<br><input type="checkbox"/> Others _____                                                                                                                                                                                                                                                                                                                                                        | <b>General findings</b><br><input type="checkbox"/> None<br><input type="checkbox"/> Globe rupture<br><input type="checkbox"/> Traumatic ophthalmoplegia<br><input type="checkbox"/> Orbital fracture<br><input type="checkbox"/> Traumatic retrobulbar hemorrhage<br><input type="checkbox"/> None<br><input type="checkbox"/> Others _____                                                                                                                                                                                                                                                                                                                       |



**Occurrence and outcome  
of ocular firework injuries in Switzerland**

**Primary surgical management**

Yes  No  Unknown **If yes**, please fill out the table:

Please provide information about both eyes in case of bilateral injury. In case of unilateral injury cross out the unaffected eye.

| <input type="checkbox"/> <b>Right Eye</b> (if injured)                                                                                                                                                                                                                                                                                                                                                                                                                                                                                                                                                                                                                                                                                                                                                                                                                                                                                                                                                                                                                                                                                                                                                                                                                                                                                                                                                                                                                                                                         | <input type="checkbox"/> <b>Left Eye</b> (if injured)                                                                                                                                                                                                                                                                                                                                                                                                                                                                                                                                                                                                                                                                                                                                                                                                                                                                                                                                                                                                                                                                                                                                                                                                                                                                                                                                                                                                                                                                          |
|--------------------------------------------------------------------------------------------------------------------------------------------------------------------------------------------------------------------------------------------------------------------------------------------------------------------------------------------------------------------------------------------------------------------------------------------------------------------------------------------------------------------------------------------------------------------------------------------------------------------------------------------------------------------------------------------------------------------------------------------------------------------------------------------------------------------------------------------------------------------------------------------------------------------------------------------------------------------------------------------------------------------------------------------------------------------------------------------------------------------------------------------------------------------------------------------------------------------------------------------------------------------------------------------------------------------------------------------------------------------------------------------------------------------------------------------------------------------------------------------------------------------------------|--------------------------------------------------------------------------------------------------------------------------------------------------------------------------------------------------------------------------------------------------------------------------------------------------------------------------------------------------------------------------------------------------------------------------------------------------------------------------------------------------------------------------------------------------------------------------------------------------------------------------------------------------------------------------------------------------------------------------------------------------------------------------------------------------------------------------------------------------------------------------------------------------------------------------------------------------------------------------------------------------------------------------------------------------------------------------------------------------------------------------------------------------------------------------------------------------------------------------------------------------------------------------------------------------------------------------------------------------------------------------------------------------------------------------------------------------------------------------------------------------------------------------------|
| <input type="checkbox"/> Globe exploration<br><input type="checkbox"/> Canthotomy<br><input type="checkbox"/> Eyelid suture<br><input type="checkbox"/> Conjunctival suture repair<br><input type="checkbox"/> Extraction of conjunctival foreign bodies<br><input type="checkbox"/> Scleral suture repair<br><input type="checkbox"/> Symblepharon ring<br><input type="checkbox"/> Abrasio<br><input type="checkbox"/> Corneal suture repair<br><input type="checkbox"/> Corneoscleral suture repair<br><input type="checkbox"/> Extraction of corneal foreign bodies<br><input type="checkbox"/> Penetrating keratoplasty à chaud<br><input type="checkbox"/> Amniotic membrane graft<br><input type="checkbox"/> Iris repair<br><input type="checkbox"/> Lensectomy without intraocular lens insertion<br><input type="checkbox"/> Lensectomy with intraocular lens insertion<br><input type="checkbox"/> Extraction of intraocular foreign bodies<br><input type="checkbox"/> Anterior chamber washout<br><input type="checkbox"/> Laser coagulation of a retinal foramen<br><input type="checkbox"/> Cryotherapy of a retinal foramen<br><input type="checkbox"/> Vitrectomy<br><input type="radio"/> Gas<br><input type="radio"/> Silicon Oil<br><input type="radio"/> BSS<br><input type="checkbox"/> Cryotherapy<br><input type="checkbox"/> Endolaser<br><input type="checkbox"/> Retinectomy<br><input type="checkbox"/> Enucleation/Evisceration<br><input type="checkbox"/> Others: please specify<br><hr/> <hr/> | <input type="checkbox"/> Globe exploration<br><input type="checkbox"/> Canthotomy<br><input type="checkbox"/> Eyelid suture<br><input type="checkbox"/> Conjunctival suture repair<br><input type="checkbox"/> Extraction of conjunctival foreign bodies<br><input type="checkbox"/> Scleral suture repair<br><input type="checkbox"/> Symblepharon ring<br><input type="checkbox"/> Abrasio<br><input type="checkbox"/> Corneal suture repair<br><input type="checkbox"/> Corneoscleral suture repair<br><input type="checkbox"/> Extraction of corneal foreign bodies<br><input type="checkbox"/> Penetrating keratoplasty à chaud<br><input type="checkbox"/> Amniotic membrane graft<br><input type="checkbox"/> Iris repair<br><input type="checkbox"/> Lensectomy without intraocular lens insertion<br><input type="checkbox"/> Lensectomy with intraocular lens insertion<br><input type="checkbox"/> Extraction of intraocular foreign bodies<br><input type="checkbox"/> Anterior chamber washout<br><input type="checkbox"/> Laser coagulation of a retinal foramen<br><input type="checkbox"/> Cryotherapy of a retinal foramen<br><input type="checkbox"/> Vitrectomy<br><input type="radio"/> Gas<br><input type="radio"/> Silicon Oil<br><input type="radio"/> BSS<br><input type="checkbox"/> Cryotherapy<br><input type="checkbox"/> Endolaser<br><input type="checkbox"/> Retinectomy<br><input type="checkbox"/> Enucleation/Evisceration<br><input type="checkbox"/> Others: please specify<br><hr/> <hr/> |

## Occurrence and outcome of ocular firework injuries in Switzerland

### Primary non-surgical (systemic and topical) management

Yes  No  Unknown **If yes**, please fill out the table:

Please provide information about both eyes in case of bilateral injury. In case of unilateral injury cross out the unaffected eye.

| <input type="checkbox"/> <b>Right Eye</b> (if injured)                                                                                                                                                                                                                                                                                                                                                                                                                                                                                                                                                                                                                                                                                                                                                                                                                          | <input type="checkbox"/> <b>Left Eye</b> (if injured)                                                                                                                                                                                                                                                                                                                                                                                                                                                                                                                                                                                                                                                                                                                                                                                                                           |
|---------------------------------------------------------------------------------------------------------------------------------------------------------------------------------------------------------------------------------------------------------------------------------------------------------------------------------------------------------------------------------------------------------------------------------------------------------------------------------------------------------------------------------------------------------------------------------------------------------------------------------------------------------------------------------------------------------------------------------------------------------------------------------------------------------------------------------------------------------------------------------|---------------------------------------------------------------------------------------------------------------------------------------------------------------------------------------------------------------------------------------------------------------------------------------------------------------------------------------------------------------------------------------------------------------------------------------------------------------------------------------------------------------------------------------------------------------------------------------------------------------------------------------------------------------------------------------------------------------------------------------------------------------------------------------------------------------------------------------------------------------------------------|
| <p><b>Topical</b></p> <p><input type="checkbox"/> Irrigation</p> <p><input type="checkbox"/> Artificial tears</p> <p><input type="checkbox"/> Intravitreal antibiotics</p> <p><input type="checkbox"/> Topical antibiotics</p> <p><input type="checkbox"/> Topical corticosteroids</p> <p><input type="checkbox"/> Topical NSAR</p> <p><input type="checkbox"/> Cycloplegics</p> <p><input type="checkbox"/> IOP lowering agents, topical</p> <p><input type="checkbox"/> Bandage lens</p> <p><b>Systemic</b></p> <p><input type="checkbox"/> Systemic antibiotics (oral and intravenous)</p> <p><input type="checkbox"/> Systemic NSAR</p> <p><input type="checkbox"/> Systemic corticosteroids</p> <p><input type="checkbox"/> IOP lowering agents, oral</p> <p><input type="checkbox"/> Tetanus Prophylaxis</p> <p><input type="checkbox"/> Others: please specify _____</p> | <p><b>Topical</b></p> <p><input type="checkbox"/> Irrigation</p> <p><input type="checkbox"/> Artificial tears</p> <p><input type="checkbox"/> Intravitreal antibiotics</p> <p><input type="checkbox"/> Topical antibiotics</p> <p><input type="checkbox"/> Topical corticosteroids</p> <p><input type="checkbox"/> Topical NSAR</p> <p><input type="checkbox"/> Cycloplegics</p> <p><input type="checkbox"/> IOP lowering agents, topical</p> <p><input type="checkbox"/> Bandage lens</p> <p><b>Systemic</b></p> <p><input type="checkbox"/> Systemic antibiotics (oral and intravenous)</p> <p><input type="checkbox"/> Systemic NSAR</p> <p><input type="checkbox"/> Systemic corticosteroids</p> <p><input type="checkbox"/> IOP lowering agents, oral</p> <p><input type="checkbox"/> Tetanus Prophylaxis</p> <p><input type="checkbox"/> Others: please specify _____</p> |

### Hospitalization:

#### Hospitalization directly after the trauma and first presentation

Yes  No

- **If yes**: hospitalization for XXX days

#### Secondary hospitalization at later time points (e.g. due to complications or surgeries during follow-up)

Yes  No

- **If yes**: hospitalization for a total of XXX days

### Duration of sick leave:

- 100% over XXX day(s) or XXX month(s) or XXX year(s)
- 50% over XXX day(s) or XXX month(s) or XXX year(s)
- Other: \_\_\_ % over XXX day(s) or XXX month(s) or XXX year(s)
- Other: \_\_\_ % over XXX day(s) or XXX month(s) or XXX year(s)
- Invalidity/disability since DD.MM.YYYY; XXX %

(German: Invalidenversicherung; French: l'assurance-invalidité; Italian: sull'assicurazione invalidità)

Unknown

None

Others: please specify \_\_\_\_\_

**Number of ophthalmological consultations:** XXX

## Occurrence and outcome of ocular firework injuries in Switzerland

### Secondary Complications

Yes  No  Unknown **If yes**, please fill out the table:

Please provide information about both eyes in case of bilateral injury. In case of unilateral injury cross out the unaffected eye.

| <input type="checkbox"/> <b>Right Eye</b> (if injured)                                                                                                                                                                                                                                                                                                                                                                                                                                                                                                                                                                                                                                                                                                                                                                                                                                                                                                                                                                                                                                                                                                                                                                                                                                                                                                                                                                                                                                                                                                                                                                                                                                                                                                                                                                     | <input type="checkbox"/> <b>Left Eye</b> (if injured)                                                                                                                                                                                                                                                                                                                                                                                                                                                                                                                                                                                                                                                                                                                                                                                                                                                                                                                                                                                                                                                                                                                                                                                                                                                                                                                                                                                                                                                                                                                                                                                                                                                                                                                                                                      |
|----------------------------------------------------------------------------------------------------------------------------------------------------------------------------------------------------------------------------------------------------------------------------------------------------------------------------------------------------------------------------------------------------------------------------------------------------------------------------------------------------------------------------------------------------------------------------------------------------------------------------------------------------------------------------------------------------------------------------------------------------------------------------------------------------------------------------------------------------------------------------------------------------------------------------------------------------------------------------------------------------------------------------------------------------------------------------------------------------------------------------------------------------------------------------------------------------------------------------------------------------------------------------------------------------------------------------------------------------------------------------------------------------------------------------------------------------------------------------------------------------------------------------------------------------------------------------------------------------------------------------------------------------------------------------------------------------------------------------------------------------------------------------------------------------------------------------|----------------------------------------------------------------------------------------------------------------------------------------------------------------------------------------------------------------------------------------------------------------------------------------------------------------------------------------------------------------------------------------------------------------------------------------------------------------------------------------------------------------------------------------------------------------------------------------------------------------------------------------------------------------------------------------------------------------------------------------------------------------------------------------------------------------------------------------------------------------------------------------------------------------------------------------------------------------------------------------------------------------------------------------------------------------------------------------------------------------------------------------------------------------------------------------------------------------------------------------------------------------------------------------------------------------------------------------------------------------------------------------------------------------------------------------------------------------------------------------------------------------------------------------------------------------------------------------------------------------------------------------------------------------------------------------------------------------------------------------------------------------------------------------------------------------------------|
| <input type="checkbox"/> Entropion<br><input type="checkbox"/> Ectropion<br><input type="checkbox"/> Trichiasis<br><input type="checkbox"/> Symblepharon<br><input type="checkbox"/> Corneal scar<br><input type="checkbox"/> central<br><input type="checkbox"/> peripheral<br><input type="checkbox"/> total<br><input type="checkbox"/> unknown<br><input type="checkbox"/> others: _____<br><input type="radio"/> <u>XX</u> mm x <u>XX</u> mm<br><input type="checkbox"/> Corneal decompensation<br><input type="checkbox"/> Corneal perforation<br><input type="checkbox"/> central<br><input type="checkbox"/> peripheral<br><input type="radio"/> tissue defect: <u>XX</u> mm x <u>XX</u> mm<br><input type="radio"/> cut: <u>XX</u> mm<br><input type="radio"/> unknown<br><input type="radio"/> others: _____<br><input type="checkbox"/> Keratoconjunctivitis sicca<br><input type="checkbox"/> Limbal Stem Cell Deficiency<br><input type="checkbox"/> Cataract (traumatic, postoperative etc.)<br><input type="checkbox"/> Steroid induced ocular hypertension<br><input type="checkbox"/> Secondary glaucoma<br><input type="radio"/> steroid induced glaucoma<br><input type="radio"/> unknown etiology<br><input type="radio"/> others: _____<br><input type="checkbox"/> Uveitis<br><input type="checkbox"/> anterior<br><input type="checkbox"/> intermedia<br><input type="checkbox"/> posterior<br><input type="checkbox"/> Phtisis bulbi<br><input type="checkbox"/> Macular scarring<br><input type="checkbox"/> Retinal detachment, Macula on<br><input type="checkbox"/> Retinal detachment, Macula off<br><input type="checkbox"/> Retinal scar<br><input type="checkbox"/> Retinal Foramina<br><input type="checkbox"/> Macular Foramina<br><input type="checkbox"/> Choroidal neovascularization | <input type="checkbox"/> Entropion<br><input type="checkbox"/> Ectropion<br><input type="checkbox"/> Trichiasis<br><input type="checkbox"/> Symblepharon<br><input type="checkbox"/> Corneal scar<br><input type="checkbox"/> central<br><input type="checkbox"/> peripheral<br><input type="checkbox"/> total<br><input type="checkbox"/> unknown<br><input type="checkbox"/> others: _____<br><input type="radio"/> <u>XX</u> mm x <u>XX</u> mm<br><input type="checkbox"/> Corneal decompensation<br><input type="checkbox"/> Corneal perforation<br><input type="checkbox"/> central<br><input type="checkbox"/> peripheral<br><input type="radio"/> tissue defect: <u>XX</u> mm x <u>XX</u> mm<br><input type="radio"/> cut: <u>XX</u> mm<br><input type="radio"/> unknown<br><input type="radio"/> others: _____<br><input type="checkbox"/> Keratoconjunctivitis sicca<br><input type="checkbox"/> Limbal Stem Cell Deficiency<br><input type="checkbox"/> Cataract (traumatic, postoperative etc.)<br><input type="checkbox"/> Steroid induced ocular hypertension<br><input type="checkbox"/> Secondary glaucoma<br><input type="radio"/> steroid induced glaucoma<br><input type="radio"/> unknown etiology<br><input type="radio"/> others: _____<br><input type="checkbox"/> Uveitis<br><input type="checkbox"/> anterior<br><input type="checkbox"/> intermedia<br><input type="checkbox"/> posterior<br><input type="checkbox"/> Phtisis bulbi<br><input type="checkbox"/> Macular scarring<br><input type="checkbox"/> Retinal detachment, Macula on<br><input type="checkbox"/> Retinal detachment, Macula off<br><input type="checkbox"/> Retinal scar<br><input type="checkbox"/> Retinal Foramina<br><input type="checkbox"/> Macular Foramina<br><input type="checkbox"/> Choroidal neovascularization |

**Occurrence and outcome  
of ocular firework injuries in Switzerland**

|                                                                                                                                                                          |                                                                                                                                                                          |
|--------------------------------------------------------------------------------------------------------------------------------------------------------------------------|--------------------------------------------------------------------------------------------------------------------------------------------------------------------------|
| <input type="checkbox"/> Traumatic optic neuropathy<br><input type="checkbox"/> Sympathetic ophthalmia<br><input type="checkbox"/> Others: please specify<br><hr/> <hr/> | <input type="checkbox"/> Traumatic optic neuropathy<br><input type="checkbox"/> Sympathetic ophthalmia<br><input type="checkbox"/> Others: please specify<br><hr/> <hr/> |
|--------------------------------------------------------------------------------------------------------------------------------------------------------------------------|--------------------------------------------------------------------------------------------------------------------------------------------------------------------------|

**Secondary non-surgical (systemic and topical) management**

Yes  No  Unknown **If yes**, please fill out the table:

Please provide information about both eyes in case of bilateral injury. In case of unilateral injury cross out the unaffected eye.

| <input type="checkbox"/> <b>Right Eye</b> (if injured)                                                                                                                                                                                                                                                                                                                                                                                                                                                                                                                                                                                                                                                                                                                                                                                                                                                                                                                                                                                                                                | <input type="checkbox"/> <b>Left Eye</b> (if injured)                                                                                                                                                                                                                                                                                                                                                                                                                                                                                                                                                                                                                                                                                                                                                                                                                                                                                                                                                                                                                                 |
|---------------------------------------------------------------------------------------------------------------------------------------------------------------------------------------------------------------------------------------------------------------------------------------------------------------------------------------------------------------------------------------------------------------------------------------------------------------------------------------------------------------------------------------------------------------------------------------------------------------------------------------------------------------------------------------------------------------------------------------------------------------------------------------------------------------------------------------------------------------------------------------------------------------------------------------------------------------------------------------------------------------------------------------------------------------------------------------|---------------------------------------------------------------------------------------------------------------------------------------------------------------------------------------------------------------------------------------------------------------------------------------------------------------------------------------------------------------------------------------------------------------------------------------------------------------------------------------------------------------------------------------------------------------------------------------------------------------------------------------------------------------------------------------------------------------------------------------------------------------------------------------------------------------------------------------------------------------------------------------------------------------------------------------------------------------------------------------------------------------------------------------------------------------------------------------|
| <p><b>Topical</b></p> <input type="checkbox"/> Artificial tears<br><input type="checkbox"/> Autologous serum eye drops<br><input type="checkbox"/> Intravitreal antibiotics<br><input type="checkbox"/> Topical antibiotics<br><input type="checkbox"/> Topical corticosteroids<br><input type="checkbox"/> Topical NSAR<br><input type="checkbox"/> Topical Immunosuppressants (e.g. Ikervis)<br><input type="checkbox"/> Cycloplegics<br><input type="checkbox"/> IOP lowering agents, topical<br><input type="checkbox"/> Bandage lens<br><input type="checkbox"/> Anti-VEGF<br><input type="checkbox"/> Intravitreal corticosteroids<br><input type="checkbox"/> Others: please specify<br><hr/> <hr/> <p><b>Systemic</b></p> <input type="checkbox"/> Systemic NSAR<br><input type="checkbox"/> Systemic antibiotics (oral and intravenous)<br><input type="checkbox"/> Systemic corticosteroids<br><input type="checkbox"/> Systemic Immunosuppressants<br><input type="checkbox"/> IOP lowering agents, oral<br><input type="checkbox"/> Others: please specify<br><hr/> <hr/> | <p><b>Topical</b></p> <input type="checkbox"/> Artificial tears<br><input type="checkbox"/> Autologous serum eye drops<br><input type="checkbox"/> Intravitreal antibiotics<br><input type="checkbox"/> Topical antibiotics<br><input type="checkbox"/> Topical corticosteroids<br><input type="checkbox"/> Topical NSAR<br><input type="checkbox"/> Topical Immunosuppressants (e.g. Ikervis)<br><input type="checkbox"/> Cycloplegics<br><input type="checkbox"/> IOP lowering agents, topical<br><input type="checkbox"/> Bandage lens<br><input type="checkbox"/> Anti-VEGF<br><input type="checkbox"/> Intravitreal corticosteroids<br><input type="checkbox"/> Others: please specify<br><hr/> <hr/> <p><b>Systemic</b></p> <input type="checkbox"/> Systemic NSAR<br><input type="checkbox"/> Systemic antibiotics (oral and intravenous)<br><input type="checkbox"/> Systemic corticosteroids<br><input type="checkbox"/> Systemic Immunosuppressants<br><input type="checkbox"/> IOP lowering agents, oral<br><input type="checkbox"/> Others: please specify<br><hr/> <hr/> |

## Occurrence and outcome of ocular firework injuries in Switzerland

### Secondary surgical management

Yes  No  Unknown **If yes**, please fill out the table:

In case of consecutive surgeries, please fill in the dates in the sub item.

Please provide information about both eyes in case of bilateral injury. In case of unilateral injury cross out the unaffected eye.

| <input type="checkbox"/> Right Eye (if injured)                                                                                                                                                                                                                                                                                                                                                                       | <input type="checkbox"/> Left Eye (if injured)                                                                                                                                                                                                                                                                                                                                                                        |
|-----------------------------------------------------------------------------------------------------------------------------------------------------------------------------------------------------------------------------------------------------------------------------------------------------------------------------------------------------------------------------------------------------------------------|-----------------------------------------------------------------------------------------------------------------------------------------------------------------------------------------------------------------------------------------------------------------------------------------------------------------------------------------------------------------------------------------------------------------------|
| <input type="checkbox"/> <b>Repair of eyelid</b> , <u>MM. YYYY</u><br>2. <u>MM. YYYY</u><br>3. <u>MM. YYYY</u>                                                                                                                                                                                                                                                                                                        | <input type="checkbox"/> <b>Repair of eyelid</b> , <u>DD. MM. YYYY</u><br>2. <u>MM. YYYY</u><br>3. <u>MM. YYYY</u>                                                                                                                                                                                                                                                                                                    |
| <input type="checkbox"/> <b>Electrical depilation</b> , <u>MM. YYYY</u><br>2. <u>MM. YYYY</u><br>3. <u>MM. YYYY</u>                                                                                                                                                                                                                                                                                                   | <input type="checkbox"/> <b>Electrical depilation</b> , <u>DD. MM. YYYY</u><br>2. <u>MM. YYYY</u><br>3. <u>MM. YYYY</u>                                                                                                                                                                                                                                                                                               |
| <input type="checkbox"/> <b>Symblepharon ring</b> <u>MM. YYYY</u><br>2. <u>MM. YYYY</u><br>3. <u>MM. YYYY</u>                                                                                                                                                                                                                                                                                                         | <input type="checkbox"/> <b>Symblepharon ring</b> <u>MM. YYYY</u><br>2. <u>MM. YYYY</u><br>3. <u>MM. YYYY</u>                                                                                                                                                                                                                                                                                                         |
| <input type="checkbox"/> <b>Symblepharon separation</b> , <u>MM. YYYY</u><br>2. <u>MM. YYYY</u><br>3. <u>MM. YYYY</u>                                                                                                                                                                                                                                                                                                 | <input type="checkbox"/> <b>Symblepharon separation</b> , <u>DD. MM. YYYY</u><br>2. <u>MM. YYYY</u><br>3. <u>MM. YYYY</u>                                                                                                                                                                                                                                                                                             |
| <input type="checkbox"/> <b>Conjunctival flap</b> , <u>MM. YYYY</u><br>2. <u>MM. YYYY</u><br>3. <u>MM. YYYY</u>                                                                                                                                                                                                                                                                                                       | <input type="checkbox"/> <b>Conjunctival flap</b> , <u>DD. MM. YYYY</u><br>2. <u>MM. YYYY</u><br>3. <u>MM. YYYY</u>                                                                                                                                                                                                                                                                                                   |
| <input type="checkbox"/> <b>Corneal suture repair</b> , <u>MM. YYYY</u><br>2. <u>MM. YYYY</u><br>3. <u>MM. YYYY</u>                                                                                                                                                                                                                                                                                                   | <input type="checkbox"/> <b>Corneal suture repair</b> , <u>MM. YYYY</u><br>2. <u>MM. YYYY</u><br>3. <u>MM. YYYY</u>                                                                                                                                                                                                                                                                                                   |
| <input type="checkbox"/> <b>Scleral suture repair</b> , <u>MM. YYYY</u><br>2. <u>MM. YYYY</u><br>3. <u>MM. YYYY</u>                                                                                                                                                                                                                                                                                                   | <input type="checkbox"/> <b>Scleral suture repair</b> , <u>MM. YYYY</u><br>2. <u>MM. YYYY</u><br>3. <u>MM. YYYY</u>                                                                                                                                                                                                                                                                                                   |
| <input type="checkbox"/> <b>Corneoscleral suture repair</b> , <u>MM. YYYY</u><br>2. <u>MM. YYYY</u><br>3. <u>MM. YYYY</u>                                                                                                                                                                                                                                                                                             | <input type="checkbox"/> <b>Corneoscleral suture repair</b> , <u>MM. YYYY</u><br>2. <u>MM. YYYY</u><br>3. <u>MM. YYYY</u>                                                                                                                                                                                                                                                                                             |
| <input type="checkbox"/> <b>Corneal transplantation</b><br><input type="checkbox"/> Penetrating keratoplasty<br><input type="checkbox"/> DALK (Deep Anterior Lamellar Keratoplasty)<br><input type="checkbox"/> DMEK (Descemet Membrane Endothelial Keratoplasty)<br><input type="checkbox"/> DSAEK (Descemet's Stripping Endothelial Keratoplasty)<br>1. <u>MM. YYYY</u><br>2. <u>MM. YYYY</u><br>3. <u>MM. YYYY</u> | <input type="checkbox"/> <b>Corneal transplantation</b><br><input type="checkbox"/> Penetrating keratoplasty<br><input type="checkbox"/> DALK (Deep Anterior Lamellar Keratoplasty)<br><input type="checkbox"/> DMEK (Descemet Membrane Endothelial Keratoplasty)<br><input type="checkbox"/> DSAEK (Descemet's Stripping Endothelial Keratoplasty)<br>1. <u>MM. YYYY</u><br>2. <u>MM. YYYY</u><br>3. <u>MM. YYYY</u> |
| <input type="checkbox"/> <b>Limbal stem cell transplant</b> , <u>MM. YYYY</u><br>2. <u>MM. YYYY</u><br>3. <u>MM. YYYY</u>                                                                                                                                                                                                                                                                                             | <input type="checkbox"/> <b>Limbal stem cell transplant</b> , <u>MM. YYYY</u><br>2. <u>MM. YYYY</u><br>3. <u>MM. YYYY</u>                                                                                                                                                                                                                                                                                             |
| <input type="checkbox"/> <b>Amniotic membrane graft</b> , <u>MM. YYYY</u><br>2. <u>MM. YYYY</u><br>3. <u>MM. YYYY</u>                                                                                                                                                                                                                                                                                                 | <input type="checkbox"/> <b>Amniotic membrane graft</b> , <u>MM. YYYY</u><br>2. <u>MM. YYYY</u><br>3. <u>MM. YYYY</u>                                                                                                                                                                                                                                                                                                 |
| <input type="checkbox"/> <b>Phototherapeutic keratectomy</b>                                                                                                                                                                                                                                                                                                                                                          | <input type="checkbox"/> <b>Phototherapeutic keratectomy</b>                                                                                                                                                                                                                                                                                                                                                          |

**Occurrence and outcome  
of ocular firework injuries in Switzerland**

|                                                                                                                                                                                                                                                                                                                                                                                                                                                                                                                                                                                                                                                                                                                                                                                                                                                                                                                                                                                                                                                                                                                                                                                                                                                                                                                                                                                                                                                                                                                                                                                                                                                                                                                                                                                                                                                                                                                                                      |                                                                                                                                                                                                                                                                                                                                                                                                                                                                                                                                                                                                                                                                                                                                                                                                                                                                                                                                                                                                                                                                                                                                                                                                                                                                                                                                                                                                                                                                                                                                                                                                                                                                                                                                                                                                                                                                                                                                                      |
|------------------------------------------------------------------------------------------------------------------------------------------------------------------------------------------------------------------------------------------------------------------------------------------------------------------------------------------------------------------------------------------------------------------------------------------------------------------------------------------------------------------------------------------------------------------------------------------------------------------------------------------------------------------------------------------------------------------------------------------------------------------------------------------------------------------------------------------------------------------------------------------------------------------------------------------------------------------------------------------------------------------------------------------------------------------------------------------------------------------------------------------------------------------------------------------------------------------------------------------------------------------------------------------------------------------------------------------------------------------------------------------------------------------------------------------------------------------------------------------------------------------------------------------------------------------------------------------------------------------------------------------------------------------------------------------------------------------------------------------------------------------------------------------------------------------------------------------------------------------------------------------------------------------------------------------------------|------------------------------------------------------------------------------------------------------------------------------------------------------------------------------------------------------------------------------------------------------------------------------------------------------------------------------------------------------------------------------------------------------------------------------------------------------------------------------------------------------------------------------------------------------------------------------------------------------------------------------------------------------------------------------------------------------------------------------------------------------------------------------------------------------------------------------------------------------------------------------------------------------------------------------------------------------------------------------------------------------------------------------------------------------------------------------------------------------------------------------------------------------------------------------------------------------------------------------------------------------------------------------------------------------------------------------------------------------------------------------------------------------------------------------------------------------------------------------------------------------------------------------------------------------------------------------------------------------------------------------------------------------------------------------------------------------------------------------------------------------------------------------------------------------------------------------------------------------------------------------------------------------------------------------------------------------|
| <p>1. <u>MM. YYYY</u><br/>2. <u>MM. YYYY</u><br/>3. <u>MM. YYYY</u></p> <p><input type="checkbox"/> <b>Keratoprostehsis</b>, <u>MM. YYYY</u></p> <p><input type="checkbox"/> <b>Iris repair</b>, <u>MM. YYYY</u><br/>2. <u>MM. YYYY</u><br/>3. <u>MM. YYYY</u></p> <p><input type="checkbox"/> <b>Peripheral iridectomy</b>, <u>MM. YYYY</u><br/>2. <u>MM. YYYY</u><br/>3. <u>MM. YYYY</u></p> <p><input type="checkbox"/> <b>Laser peripheral iridotomy</b>, <u>MM. YYYY</u><br/>2. <u>MM. YYYY</u><br/>3. <u>MM. YYYY</u></p> <p><input type="checkbox"/> <b>Lensectomy with intraocular lens insertion</b>,<br/><u>MM. YYYY</u></p> <p><input type="checkbox"/> <b>Secondary intraocular lens insertion</b><br/>1. <u>MM. YYYY</u><br/>2. <u>MM. YYYY</u><br/>3. <u>MM. YYYY</u></p> <p><input type="checkbox"/> <b>Laser coagulation of a retinal foramen</b><br/>1. <u>MM. YYYY</u><br/>2. <u>MM. YYYY</u><br/>3. <u>MM. YYYY</u></p> <p><input type="checkbox"/> <b>Cryotherapy of a retinal foramen</b><br/>1. <u>MM. YYYY</u><br/>2. <u>MM. YYYY</u><br/>3. <u>MM. YYYY</u></p> <p><input type="checkbox"/> <b>Vitrectomy</b>, <u>MM. YYYY</u><br/>2. <u>MM. YYYY</u><br/>3. <u>MM. YYYY</u></p> <p><input type="checkbox"/> Gas<br/><input type="checkbox"/> Silicon Oil<br/><input type="checkbox"/> BSS<br/><input type="checkbox"/> Cryotherapy<br/><input type="checkbox"/> Endolaser<br/><input type="checkbox"/> Retinectomy</p> <p><input type="checkbox"/> <b>Glaucoma surgery</b><br/><input type="checkbox"/> Trabeculectomy, <u>MM. YYYY</u><br/><input type="checkbox"/> Deep sclerectomy, <u>MM. YYYY</u><br/><input type="checkbox"/> Stents/Tubes, <u>MM. YYYY</u><br/><input type="checkbox"/> Others : _____,<br/><u>MM. YYYY</u></p> <p><input type="checkbox"/> <b>Eviszeration/Enucleation</b> <u>MM. YYYY</u></p> <p><input type="checkbox"/> <b>Others:</b><br/>_____, <u>MM. YYYY</u><br/>_____, <u>MM. YYYY</u></p> | <p>1. <u>MM. YYYY</u><br/>2. <u>MM. YYYY</u><br/>3. <u>MM. YYYY</u></p> <p><input type="checkbox"/> <b>Keratoprostehsis</b>, <u>MM. YYYY</u></p> <p><input type="checkbox"/> <b>Iris repair</b>, <u>MM. YYYY</u><br/>2. <u>MM. YYYY</u><br/>3. <u>MM. YYYY</u></p> <p><input type="checkbox"/> <b>Peripheral iridectomy</b>, <u>MM. YYYY</u><br/>2. <u>MM. YYYY</u><br/>3. <u>MM. YYYY</u></p> <p><input type="checkbox"/> <b>Laser peripheral iridotomy</b>, <u>MM. YYYY</u><br/>2. <u>MM. YYYY</u><br/>3. <u>MM. YYYY</u></p> <p><input type="checkbox"/> <b>Lensectomy with intraocular lens insertion</b>,<br/><u>MM. YYYY</u></p> <p><input type="checkbox"/> <b>Secondary intraocular lens insertion</b><br/>1. <u>MM. YYYY</u><br/>2. <u>MM. YYYY</u><br/>3. <u>MM. YYYY</u></p> <p><input type="checkbox"/> <b>Laser coagulation of a retinal foramen</b><br/>1. <u>MM. YYYY</u><br/>2. <u>MM. YYYY</u><br/>3. <u>MM. YYYY</u></p> <p><input type="checkbox"/> <b>Cryotherapy of a retinal foramen</b><br/>1. <u>MM. YYYY</u><br/>2. <u>MM. YYYY</u><br/>3. <u>MM. YYYY</u></p> <p><input type="checkbox"/> <b>Vitrectomy</b>, <u>MM. YYYY</u><br/>2. <u>MM. YYYY</u><br/>3. <u>MM. YYYY</u></p> <p><input type="checkbox"/> Gas<br/><input type="checkbox"/> Silicon Oil<br/><input type="checkbox"/> BSS<br/><input type="checkbox"/> Cryotherapy<br/><input type="checkbox"/> Endolaser<br/><input type="checkbox"/> Retinectomy</p> <p><input type="checkbox"/> <b>Glaucoma surgery</b><br/><input type="checkbox"/> Trabeculectomy, <u>MM. YYYY</u><br/><input type="checkbox"/> Deep sclerectomy, <u>MM. YYYY</u><br/><input type="checkbox"/> Stents/Tubes, <u>MM. YYYY</u><br/><input type="checkbox"/> Others : _____,<br/><u>MM. YYYY</u></p> <p><input type="checkbox"/> <b>Eviszeration/Enucleation</b> <u>MM. YYYY</u></p> <p><input type="checkbox"/> <b>Others:</b><br/>_____, <u>MM. YYYY</u><br/>_____, <u>MM. YYYY</u></p> |
|------------------------------------------------------------------------------------------------------------------------------------------------------------------------------------------------------------------------------------------------------------------------------------------------------------------------------------------------------------------------------------------------------------------------------------------------------------------------------------------------------------------------------------------------------------------------------------------------------------------------------------------------------------------------------------------------------------------------------------------------------------------------------------------------------------------------------------------------------------------------------------------------------------------------------------------------------------------------------------------------------------------------------------------------------------------------------------------------------------------------------------------------------------------------------------------------------------------------------------------------------------------------------------------------------------------------------------------------------------------------------------------------------------------------------------------------------------------------------------------------------------------------------------------------------------------------------------------------------------------------------------------------------------------------------------------------------------------------------------------------------------------------------------------------------------------------------------------------------------------------------------------------------------------------------------------------------|------------------------------------------------------------------------------------------------------------------------------------------------------------------------------------------------------------------------------------------------------------------------------------------------------------------------------------------------------------------------------------------------------------------------------------------------------------------------------------------------------------------------------------------------------------------------------------------------------------------------------------------------------------------------------------------------------------------------------------------------------------------------------------------------------------------------------------------------------------------------------------------------------------------------------------------------------------------------------------------------------------------------------------------------------------------------------------------------------------------------------------------------------------------------------------------------------------------------------------------------------------------------------------------------------------------------------------------------------------------------------------------------------------------------------------------------------------------------------------------------------------------------------------------------------------------------------------------------------------------------------------------------------------------------------------------------------------------------------------------------------------------------------------------------------------------------------------------------------------------------------------------------------------------------------------------------------|

Case Report Form:

**Occurrence and outcome  
of ocular firework injuries in Switzerland**

|                  |                  |
|------------------|------------------|
| _____ , MM. YYYY | _____ , MM. YYYY |
| _____ , MM. YYYY | _____ , MM. YYYY |
| _____ , MM. YYYY | _____ , MM. YYYY |
| _____ , MM. YYYY | _____ , MM. YYYY |
| _____ , MM. YYYY | _____ , MM. YYYY |
| _____ , MM. YYYY | _____ , MM. YYYY |
| _____ , MM. YYYY | _____ , MM. YYYY |
| _____ , MM. YYYY | _____ , MM. YYYY |
| _____ , MM. YYYY | _____ , MM. YYYY |
| _____ , MM. YYYY | _____ , MM. YYYY |
| _____ , MM. YYYY | _____ , MM. YYYY |
| _____ , MM. YYYY | _____ , MM. YYYY |
| _____ , MM. YYYY | _____ , MM. YYYY |
| _____ , MM. YYYY | _____ , MM. YYYY |
| _____ , MM. YYYY | _____ , MM. YYYY |
